# 1 What the Phage: A scalable workflow for 2 the identification and analysis of phage 3 sequences

4 Mike Marquet<sup>1,7</sup>, Martin Hölzer<sup>3</sup>, Mathias W. Pletz<sup>1</sup>, Adrian Viehweger<sup>2</sup>, Oliwia Makarewicz<sup>1</sup>,  
5 Ralf Ehricht<sup>4,5,6</sup>, Christian Brandt<sup>1</sup>

6 <sup>1</sup> Institute for Infectious Diseases and Infection Control, Jena University Hospital, Jena, 07747, Germany

7 <sup>2</sup> Institute for Medical Microbiology and Epidemiology of Infectious Diseases, University Hospital Leipzig, Leipzig,  
8 04103, Germany

9 <sup>3</sup> RNA Bioinformatics and High-Throughput Analysis, Friedrich Schiller University Jena, Leutragraben 1, 07743  
10 Jena, Germany

11 <sup>4</sup> Leibniz Institute of Photonic Technology (Leibniz-IPHT), Jena, Germany

12 <sup>5</sup> InfectoGnostics Research Campus, Jena, Germany

13 <sup>6</sup> Institute of Physical Chemistry, Friedrich-Schiller-University Jena, Jena, Germany

14 <sup>7</sup> Center of Sepsis Control and Care (CSCC), Jena, Germany

## 15 Abstract

16 Phages are among the most abundant and diverse biological entities on earth. Identification  
17 from sequence data is a crucial first step to understand their impact on the environment. A  
18 variety of bacteriophage identification tools have been developed over the years. They differ  
19 in algorithmic approach, results and ease of use. We, therefore, developed “What the  
20 Phage” (WtP), an easy-to-use and parallel multitool approach for phage identification  
21 combined with an annotation and classification downstream strategy, thus, supporting the  
22 user’s decision-making process when the phage identification tools are not in agreement to  
23 each other. WtP is reproducible and scales to thousands of datasets through the use of a

24 workflow manager (Nextflow). WtP is freely available under a GPL-3.0 license  
25 ([https://github.com/replikation/What\\_the\\_Phage](https://github.com/replikation/What_the_Phage)).

## 26 Introduction

27 Bacteriophages (phages) are viruses that infect prokaryotes and replicate by utilizing the  
28 metabolism of the host (1). They are among the most abundant and diverse organisms on the  
29 planet and inhabit almost every environment (2). Phages drive and maintain bacterial diversity  
30 by perpetuating the coevolutionary interactions with their bacterial prey, facilitating horizontal  
31 gene transfer, and nutrient turnover through continuous cycles of predation and coevolution  
32 (3,4). They have a direct impact on the microbiome e.g. the human gut and can influence  
33 human health (5). However, despite having considerable impacts on microbial ecosystems  
34 such as the human gut, they remain one of the least understood members of complex  
35 communities (6).

36 The sequencing of the entire DNA of environmental samples (metagenomics) is an essential  
37 approach to gain insights into the microbiome and functional properties. It should be noted  
38 that due to the small genome size of phages (5 kbp to 300 kbp) (7), their entire genome can  
39 be sequenced assembly-free via long-read technologies (e.g., Oxford Nanopore  
40 Technologies or PacBio) (8). This facilitates phage genome recovery in their natural habitat,  
41 without the need to culture their hosts to isolate the phages (2). However, the identification  
42 of phages from metagenomes in general and their differentiation from prophages remains a  
43 challenge as there is no established computational gold standard (9).

44 Existing identification tools rely on direct comparison of sequence similarity (10,11), sequence  
45 composition (12,13), and models based on these features derived through learning algorithms  
46 (10,11,14,15).

47 The performance of each identification method varies greatly depending on the sample type  
48 or material, the sequencing technology, and the assembly method, which makes the correct  
49 choice for any given sample difficult without having to install and test several tools.

50 To further complicate matters, the user can choose from many tools based on different  
51 calculation strategies and based on different software dependencies and databases. While  
52 working with these phage identification tools, we observed various installation issues and  
53 conflicts making a multi-tool screening approach unnecessary complex and time-consuming.  
54 To overcome these obstacles and issues we developed “What the Phage” (WtP), a  
55 reproducible, accessible and scalable workflow utilizing the advantages of multiple  
56 identification tools in parallel to detect and annotate phages.

## 57 Design and Implementation

58 WtP was implemented in Nextflow, a portable, scalable, and parallelizable workflow manager  
59 (16). At the time of writing, twelve different approaches to identify phage sequences are  
60 included in WtP besides other programs for further annotation and classification. WtP uses  
61 so-called containers (Docker or Singularity) for an installation-free workflow execution without  
62 dependency or operating system conflicts for each of the currently over 21 programs included.  
63 All containers are pre-build, version-controlled, online available at [dockerhub.com](https://dockerhub.com) and  
64 automatically downloaded if used. Additionally, all nine different databases/datasets used by  
65 the workflow are automatically managed. The modular code structure and functionalities of  
66 Nextflow and Docker/Singularity allow easy integration of other phage prediction tools and  
67 additional analysis steps in future releases of the pipeline. The workflow consists of two main  
68 steps which are executed subsequently or, if specified, individually (see Figure 1):

- 69 1. Identification: The identification of putative phage sequences
- 70 2. Annotation & Taxonomy: The gene annotation and taxonomic classification of phage  
71 sequences

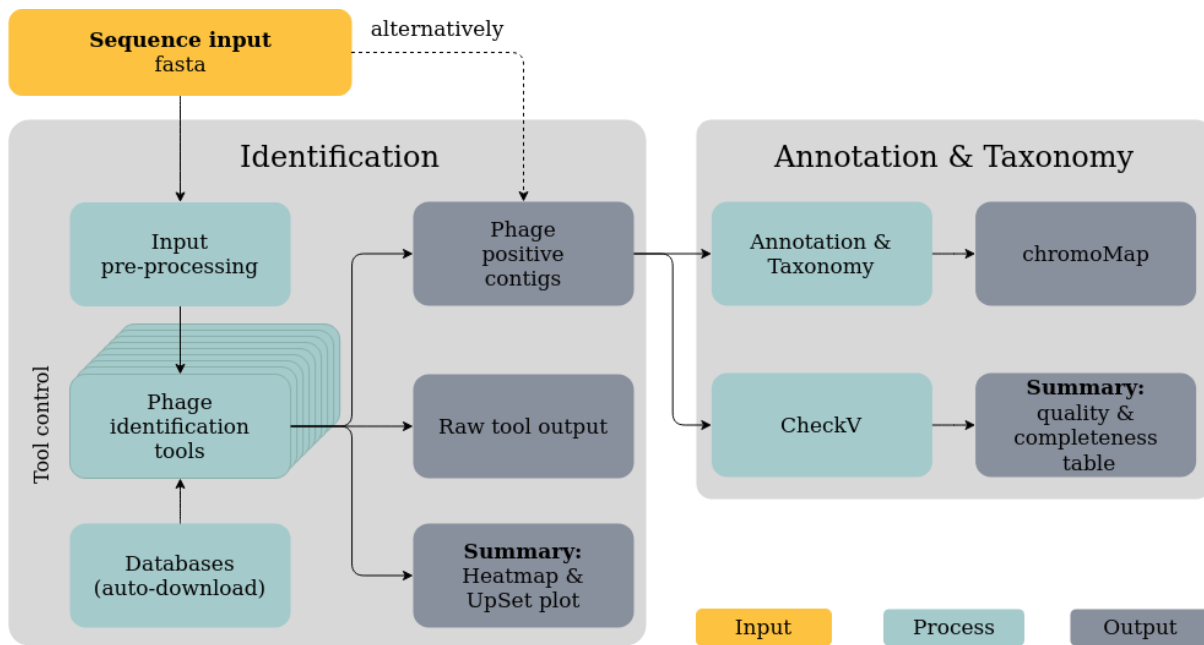

72

73 Figure 1: Simplified DAG chart of the “What the Phage” workflow. Sequence input (yellow) can  
74 either be first-run through the “Identification” and subsequently “Annotation & Taxonomy” as  
75 a whole or used directly as an input for the “Annotation & Taxonomy” only. Each of the multiple  
76 phage identification tools can be individually controlled if needed (tool control).

## 77 Identification and Visualization

78 The first step takes a multi fasta file as input (e.g. a metagenome assembly), formats it to the  
79 demands of each tool and filters sequences below a user-defined length threshold (1,500 bp  
80 by default) via SeqKit v0.10.1 (17). Sequences which are too small usually generate false-  
81 positive hits as observed by Gregory *et al.* (18). The phage identification process is performed  
82 by nine different tools in parallel: VirFinder v1.1 (13), PPR-Meta v1.1 (15), VirSorter v1.0.6  
83 (with and without virome mode) (11), DeepVirFinder v1.0 (19), Metaphinder with no release  
84 version (using default database and own database) (20), MARVEL v0.2 (14), sourmash v2.0.1  
85 (12), Vibrant v1.2.1 (with and without virome mode) (10), and VirNet v0.1 (21). Positive  
86 identifications are collected, filtered by adjustable parameters (Table 1), and the results are  
87 summarized via a detailed heat map (Figure 3 A) that serves as a general identification  
88 performance overview of each input sample. In addition, and because standard Venn and

89 Euler diagrams are an inadequate solution for quantitative visualization of multiple ( $n > 4$ )  
 90 intersections, we used an R package to generate UpSet plots (22) as a scalable alternative  
 91 for visualizing intersecting sets and their properties (Figure 2).

92

93 Table 1: Overview of the default criteria for “What the Phage” to determine a phage positive  
 94 contig by the raw output results of each tool. VirSorter and Vibrant are executed in default and  
 95 virome mode. MetaPhinder is executed with the default database and an own database based  
 96 on Zheng *et al.* (23).

| <b>Tool</b>                      | <b>Criteria</b>                                                       | <b>Filter</b>      |
|----------------------------------|-----------------------------------------------------------------------|--------------------|
| MARVEL                           | probability according to Random Forest algorithm                      | > 75 %             |
| VirFinder                        | p-value                                                               | > 0.9              |
| PPR-Meta                         | contig classification                                                 | “Phage”            |
| VirSorter & VirSorter_virome     | Category of detection (1, 2 or 3: intact, incomplete or questionable) | Category 1 & 2     |
| MetaPhinder & MetaPhinder-own-DB | A) contig classification & B) average nucleotide identity %           | A) Phage & B) > 50 |
| DeepVirFinder                    | p-value                                                               | > 0.9              |
| Vibrant & Vibrant_virome         | contig classification                                                 | Virus              |
| Virnet                           | p-value (as median across all hits per contig)                        | > 0.5              |
| Sourmash                         | Similarity score                                                      | > 0.5              |

97

## 98 Annotation & Taxonomy

99 For this step, phage positive contigs are used and either automatically retrieved from the  
100 identification step or directly via user input. Prodigal v2.6.3-1 (22) is used in metagenome  
101 mode to predict ORFs and HMMER v3.3 (24) to identify homologs via the pVOG-database  
102 (25). All annotations are summarized in an interactive HTML file via chromoMap (26) (see  
103 Figure 3 B). Additionally, WtP classifies positive matches via sourmash and thus provides a  
104 taxonomic classification of already known phages.

## 105 Other features

106 All mandatory databases and containers are automatically downloaded when the workflow is  
107 started and stored for following executions. Additionally, the workflow can be pre-setup in  
108 order to subsequently analyse sequences offline. To support a transparent and reproducible  
109 mode of operation, the raw output of each tool is provided. Maximum execution stability is  
110 ensured by automatically excluding phage identification tools that cannot analyse the input  
111 data without failing the workflow (e.g. file too large, not the scope of an individual tool).

## 112 Dependencies and version control

113 WtP requires only the workflow management software Nextflow (16) and either Docker or  
114 Singularity (27) installed and configured on the system. The pipeline was tested on Ubuntu  
115 16.04 LTS, Ubuntu 18.04 LTS and Windows 10 (via Windows Subsystem for Linux 2 using  
116 Docker). The installation process is described in detail at  
117 [https://github.com/replikation/What\\_the\\_Phage](https://github.com/replikation/What_the_Phage). Each workflow release specifies the Nextflow  
118 version the code was tested on to avoid any version conflicts between the workflow code and  
119 the workflow manager at any time. A specific Nextflow version can always be directly  
120 downloaded as an executable file from <https://github.com/nextflow-io/nextflow/releases>.

121 Additionally, each container used in the workflow is tagged by the accompanying tool version,  
122 pre-build and stored on [hub.docker.com](https://hub.docker.com).

## 123 Results

124 To demonstrate the utility and performance of WtP, we analysed a described metagenome  
125 data set (ENA Study PRJEB6941) using a local desktop machine (24 threads, 60 GB RAM,  
126 Ubuntu 18.04.4 LTS) and WtP release v0.8.0. In this study (28), Kleiner *et al.* sequenced an  
127 artificial microbiome sample which was produced via bacteria and phage cultures in mice  
128 faeces (germ-free C57BL/6 J mice). The samples contained six different phages: P22, T3, T7,  
129  $\phi 6$ , M13 and  $\phi$ VPE25.

130 The raw read data set composed of eight samples was downloaded from the ENA server and  
131 individually assembled via metaSPAdes v3.14 using the default settings (29). The resulting  
132 eight assembly files (available at [https://github.com/mult1fractal/WtP\\_test-](https://github.com/mult1fractal/WtP_test-data/tree/master/01.Phage_assemblies)  
133 [data/tree/master/01.Phage\\_assemblies](https://github.com/mult1fractal/WtP_test-data/tree/master/01.Phage_assemblies)) were analysed with WtP (release v0.8.0, default  
134 settings). As WtP uses multiple tools for phage identification, an UpSet plot summarizes for  
135 each sample the performance of all approaches executed successfully (see Figure 2 for  
136 sample ERR575692 and Supplementary Dataset for all samples).

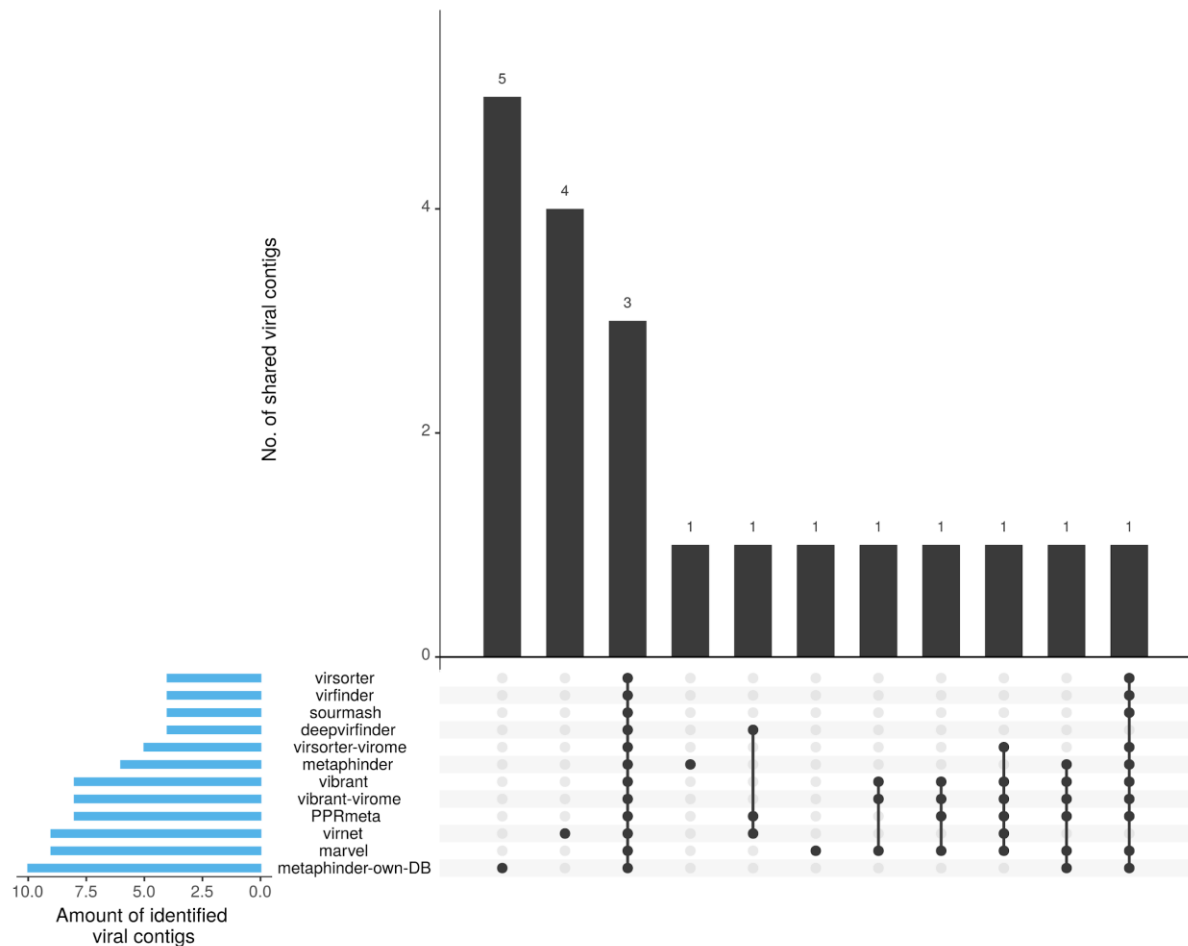

137

138 *Figure 2: UpSet plot summarizing the identification performance of each tool for the sample*  
 139 *ERR575692. The total amount of identified phage-contigs per tool is shown in blue bars on*  
 140 *the left. Black bars visualize the number of contigs that each tool or tool combination has*  
 141 *uniquely identified. Each tool combination is shown below the barplot as a dot matrix.*

142

143 The workflow was able to detect contigs that correspond to the phages P22, T3, T7 and VPE25  
 144 in all eight samples. In addition, the phage for the internal Illumina control (phiX174) was also  
 145 identified. The M13 phage (27) could not be identified as it was not assembled via  
 146 metaSPAdes due to the low read-abundance and low coverages (below 0.55x, determined by  
 147 Kleiner *et. al* (27)). The same applies to phage  $\phi 6$  which was not detectable by Kleiner *et. al*  
 148 (27).

149 Unknown or novel phages, false-positive hits and tool disagreements are all plausible results  
 150 during the phage identification step. Therefore, WtP generates for each positive contig a visual



151 plot highlighting the identified phage genes and additionally a heatmap to visualize tool  
 152 agreements for each contig. While for some contigs all tools agreed, in many cases, only a  
 153 handful (e.g. 6 out of 12 in case of VPE25 ) could identify the phage positive contig (Figure 3  
 154 A). VPE25 was initially not taxonomically classified by WtP as it was not represented in the  
 155 taxonomic database at this time, however, the corresponding positive contig was annotated  
 156 with multiple different essential phage genes (Figure 3 B). Therefore, this unclassified but  
 157 positive contig was compared via blastn and matched against the genome sequence of VPE25  
 158 (PRJEB13004).  
 159

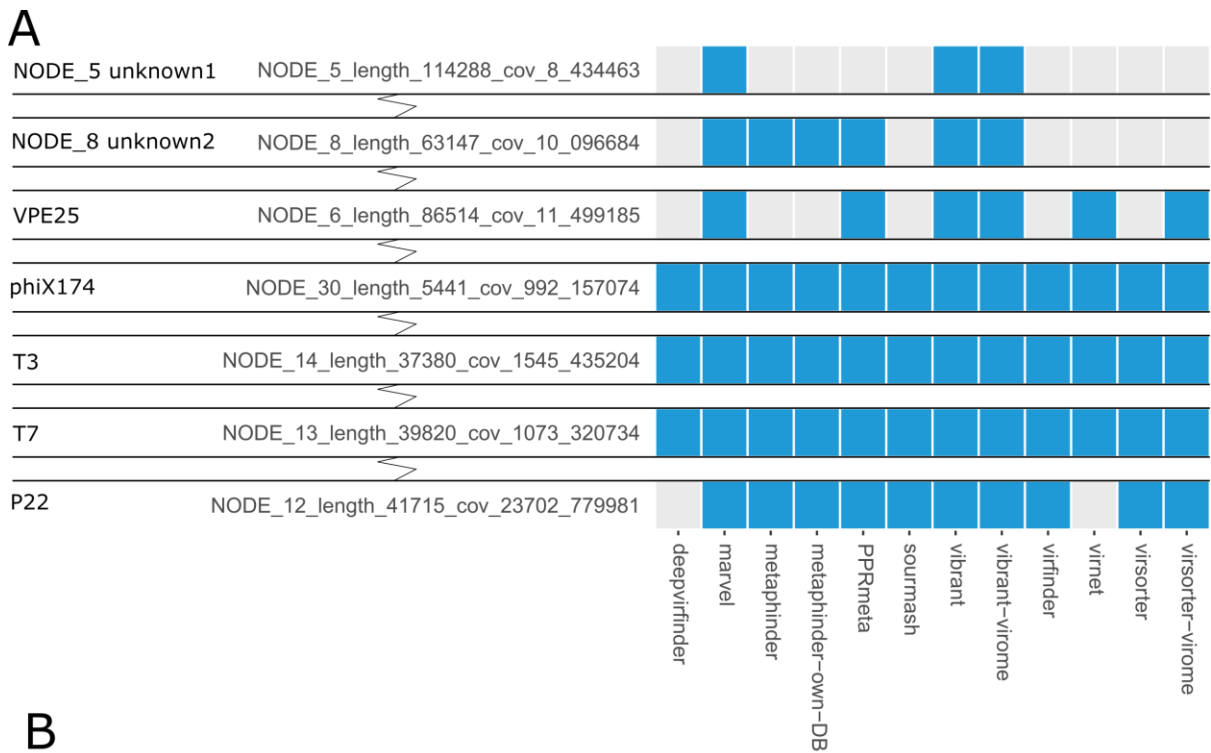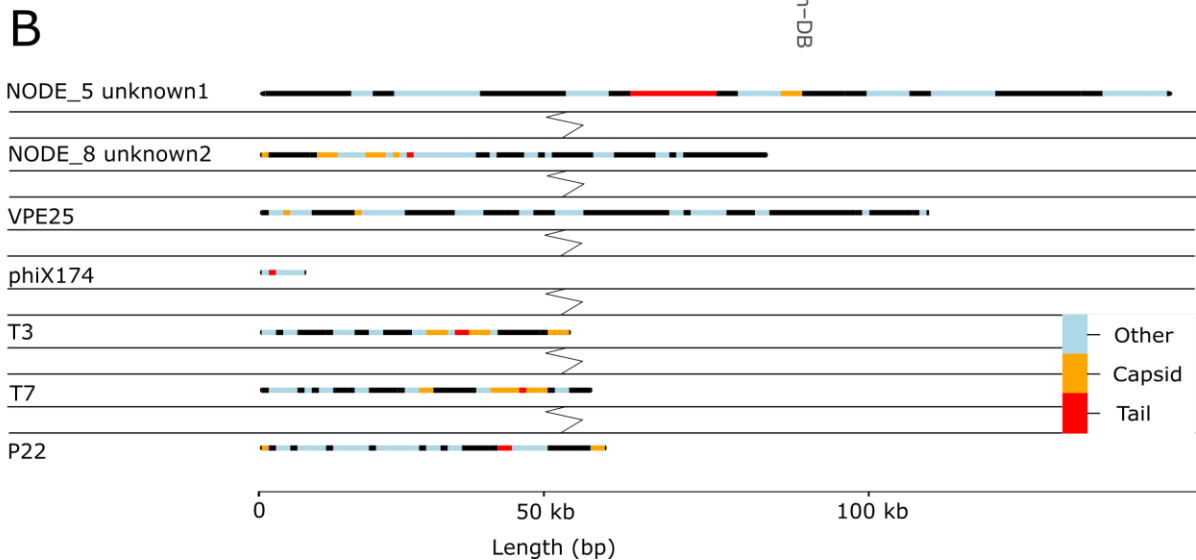

160

161 *Figure 3: (A) Modified heatmap for assembly ERR575692 visualising the tool agreements per*  
162 *phage positive contig and (B) a visual annotation of phage contigs and annotated protein-*  
163 *coding genes via chromoMap. Annotations are coloured based on the categories of capsid*  
164 *genes (orange), tail genes (red) and other phage genes (blue). Other contigs without either*  
165 *capsid or tail genes have been removed for better readability. All unedited figures for each*  
166 *sample can be found in the Supplementary Dataset.*

167

168 WtP streamlines the detection of phage sequences across multiple tools and thus balancing  
169 some drawbacks of tools (e.g. relying on updated databases, only identifying known phages).

170 This issue is best highlighted in Figure 3 A: P22 could not be identified by either VirNet or  
171 DeepVirFinder and VPE25 could not be identified by DeepVirFinder, MetaPhinder (both  
172 databases), sourmash, VirFinder and VirSorter without the virome option. However, besides  
173 other phage genes (e.g. DNA ligase, helicase), capsid and tail genes could be clearly  
174 annotated for both (Figure 3 B: P22 and VPE25). Furthermore, CheckV determined a phage  
175 completeness score of over 99.99 for both P22 and VPE25 (Table 2).

176 In addition to the above-mentioned phages, WtP identified two more large contigs with capsid  
177 and tail annotations and a taxonomic assignment pointing to a phage of *Salmonella enterica*  
178 (contig NODE\_5 and NODE\_8). However, both contigs are labelled as prophages via CheckV  
179 with an estimated completeness of over 99.99 %. These phage positive contigs match to  
180 prophages *Salmonella enterica* (additionally confirmed via blastn search on NCBI) and they  
181 were identified in six out of eight samples.

182

183 Table 2: Summary of the CheckV output for the sample ERR575692. All contigs with a  
184 completeness > 10 % and a length > 5,000 bp are shown.

185

| <b>Phage name</b> | <b>Contig_id</b> | <b>Gene count</b> | <b>CheckV quality</b> | <b>Completeness</b> | <b>contig length [bp]</b> |
|-------------------|------------------|-------------------|-----------------------|---------------------|---------------------------|
| unknown1          | NODE_5           | 107               | Complete              | 100.0               | 114,288                   |
| unknown2          | NODE_8           | 71                | High-quality          | 100.0               | 63,147                    |
| VPE25             | NODE_6           | 137               | High-quality          | 99.99               | 86,514                    |
| phiX174           | NODE_30          | 8                 | Medium-quality        | 89.31               | 5,441                     |
| T3                | NODE_14          | 43                | High-quality          | 93.36               | 37,380                    |
| T7                | NODE_13          | 53                | Complete              | 99.46               | 39,820                    |
| P22               | NODE_12          | 67                | Complete              | 100.0               | 41,715                    |

186

187 Some limitations must be noted. No specialised phage assembly strategy or any cleanup step  
188 were included during the assembly step. Therefore, some smaller mice host contigs (below  
189 5,000 bp) produced false positive hits. However, these contigs were clearly distinguishable  
190 after the “Annotation & Taxonomy” step both in CheckV and due to the lack of typical genes  
191 related to e.g. capsid or tail proteins, showing the application of WtP also for contaminated  
192 datasets

## 193 Conclusion

194 With the rise of metagenomics and the application of machine learning principles for virus  
195 detection, several phage identification tools have been released over the last few years. All  
196 these tools utilize different identification approaches, all with advantages and limitations. The  
197 choice of the user of a certain tool often depends strongly on its usability and less on its  
198 performance. While some tools already come with a packaging system such as Conda or a  
199 containerized environment, there exists no general framework for their execution and  
200 different filter parameters, database dependencies, and installation issues prevent many

201 potential users from using certain tools. At least one multitool approach was implemented  
202 on a smaller scale by Ann C. Gregory *et al.* (comprising only VirFinder and VirSorter) (20).  
203 The overarching goal of WtP is to identify positive phage sequences via a comprehensive  
204 and extendable multitool approach that is easy to use across different platforms. After a WtP  
205 run, the user is provided with sufficient processed data (such as tool performance  
206 comparisons, taxonomic assessments, and annotation maps) to reliably work with the  
207 identified sequences. The results support the decision-making process of the user if different  
208 identification tools are not in agreement with each other (e.g.: see reported results for VPE25  
209 phage). Thus, WtP streamlines the identification of phage sequence recognition across  
210 multiple tools in a reproducible and scalable workflow to allow researchers to concentrate on  
211 their scientific questions instead of software implementations.

## 212 Future directions

213 WtP is a workflow project that will be improved and extended as the modular approach and  
214 containerisation simplify the integration of new tools. Besides the intended main application of  
215 the workflow - the identification of phages - the workflow can be used to benchmark current  
216 and novel virus detection tools in a continuous manner. The predictive scope of WtP can be  
217 extended to other viruses (such as RNA viruses) and prophages by including future tools  
218 specifically designed for such use cases and by adjusting filter and annotation steps.  
219 Furthermore, we plan to support the input of raw long reads as an alternative to assemblies.  
220 The versioning of WtP represents a well-functioning approach with tested and up-to-date  
221 versions of the workflow. Thus, the correct functioning of the workflow is always guaranteed  
222 and allows a reliable and fast identification of phage sequences.

## 223 Declarations

### 224 Availability

225 Source code: [https://github.com/replikation/What\\_the\\_Phage](https://github.com/replikation/What_the_Phage)

226  
227 Supplementary Dataset: [https://github.com/mult1fractal/WtP\\_test\\_profile\\_results](https://github.com/mult1fractal/WtP_test_profile_results)  
228  
229 Sequence data used in this work is available at: [https://github.com/mult1fractal/WtP\\_test-](https://github.com/mult1fractal/WtP_test-)  
230 data

## 231 Competing interest

232 None to declare.

## 233 Funding

234 This study was supported by the Federal Ministry of Education and Research (BMBF),  
235 Germany, grant numbers 01EO1502 and 13GW0423B.

## 236 Acknowledgements

237 We thank Michael Shamash towards helping to properly test and validate WtP on a SLURM  
238 based HPC with Singularity.

## 239 References

- 240 1. G MTP, B LS, L MES. Bacteriophage Genome Sequencing: A New Alternative to  
241 Understand Biochemical Interactions between Prokaryotic Cells and Phages. *J Microb*  
242 *Biochem Technol.* 2017;9(4):1–5.
- 243 2. Clokie MR, Millard AD, Letarov AV, Heaphy S. Phages in nature. *Bacteriophage.*  
244 2011;1(1):31–45.
- 245 3. De Sordi L, Lourenço M, Debarbieux L. The Battle Within: Interactions of  
246 Bacteriophages and Bacteria in the Gastrointestinal Tract. *Cell Host Microbe.* 2019  
247 13;25(2):210–8.
- 248 4. Reyes A, Semenkovich NP, Whiteson K, Rohwer F, Gordon JI. Going viral: next-  
249 generation sequencing applied to phage populations in the human gut. *Nat Rev*  
250 *Microbiol.* 2012 Sep;10(9):607–17.
- 251 5. Divya Ganeshan S, Hosseinidoust Z. Phage Therapy with a Focus on the Human  
252 Microbiota. *Antibiotics* [Internet]. 2019 Aug 27 [cited 2020 May 25];8(3). Available from:  
253 <https://www.ncbi.nlm.nih.gov/pmc/articles/PMC6783874/>
- 254 6. Sutton TDS, Hill C. Gut Bacteriophage: Current Understanding and Challenges. *Front*  
255 *Endocrinol* [Internet]. 2019 [cited 2020 May 23];10. Available from:  
256 <https://www.frontiersin.org/articles/10.3389/fendo.2019.00784/full>
- 257 7. Hatfull GF, Hendrix RW. Bacteriophages and their Genomes. *Curr Opin Virol.* 2011 Oct  
258 1;1(4):298–303.
- 259 8. Beaulaurier J, Luo E, Eppley J, Uyl PD, Dai X, Turner DJ, et al. Assembly-free single-  
260 molecule nanopore sequencing recovers complete virus genomes from natural microbial  
261 communities [Internet]. *Microbiology*; 2019 Apr [cited 2020 Jun 10]. Available from:  
262 <http://biorxiv.org/lookup/doi/10.1101/619684>
- 263 9. Overholt WA, Hölzer M, Geesink P, Diezel C, Marz M, Küsel K. Inclusion of Oxford  
264 Nanopore long reads improves all microbial and phage metagenome-assembled  
265 genomes from a complex aquifer system. *bioRxiv.* 2019 Dec 19;2019.12.18.880807.  
266
- 266 10. Kieft K, Zhou Z, Anantharaman K. VIBRANT: Automated recovery, annotation and

- 267 curation of microbial viruses, and evaluation of virome function from genomic  
268 sequences. *bioRxiv*. 2019 Nov 26;855387.
- 269 11. Roux S, Enault F, Hurwitz BL, Sullivan MB. VirSorter: mining viral signal from microbial  
270 genomic data. *PeerJ*. 2015 May 28;3:e985.
- 271 12. Brown C, Irber L. sourmash: a library for MinHash sketching of DNA. *J Open Source*  
272 *Softw*. 2016 Sep 14;1(5):27.
- 273 13. Ren J, Ahlgren NA, Lu YY, Fuhrman JA, Sun F. VirFinder: a novel k-mer based tool for  
274 identifying viral sequences from assembled metagenomic data. *Microbiome*. 2017 Jul  
275 6;5(1):69.
- 276 14. Amgarten D, Braga LPP, da Silva AM, Setubal JC. MARVEL, a Tool for Prediction of  
277 Bacteriophage Sequences in Metagenomic Bins. *Front Genet* [Internet]. 2018 [cited  
278 2020 May 1];9. Available from:  
279 <https://www.frontiersin.org/articles/10.3389/fgene.2018.00304/full>
- 280 15. Fang Z, Tan J, Wu S, Li M, Xu C, Xie Z, et al. PPR-Meta: a tool for identifying phages  
281 and plasmids from metagenomic fragments using deep learning. *GigaScience* [Internet].  
282 2019 Jun 20 [cited 2020 May 1];8(6). Available from:  
283 <https://www.ncbi.nlm.nih.gov/pmc/articles/PMC6586199/>
- 284 16. Di Tommaso P, Chatzou M, Floden EW, Barja PP, Palumbo E, Notredame C. Nextflow  
285 enables reproducible computational workflows. *Nat Biotechnol*. 2017 11;35(4):316–9.
- 286 17. Shen W, Le S, Li Y, Hu F. SeqKit: A Cross-Platform and Ultrafast Toolkit for FASTA/Q  
287 File Manipulation. *PLoS ONE* [Internet]. 2016 Oct 5 [cited 2020 Jun 10];11(10). Available  
288 from: <https://www.ncbi.nlm.nih.gov/pmc/articles/PMC5051824/>
- 289 18. Gregory AC, Zayed AA, Conceição-Neto N, Temperton B, Bolduc B, Alberti A, et al.  
290 Marine DNA Viral Macro- and Microdiversity from Pole to Pole. *Cell*. 2019  
291 May;177(5):1109-1123.e14.
- 292 19. Ren J, Song K, Deng C, Ahlgren NA, Fuhrman JA, Li Y, et al. Identifying viruses from  
293 metagenomic data by deep learning. *ArXiv180607810 Q-Bio* [Internet]. 2018 Jun 20  
294 [cited 2020 May 1]; Available from: <http://arxiv.org/abs/1806.07810>
- 295 20. Jurtz VI, Villarreal J, Lund O, Larsen MV, Nielsen M. MetaPhinder—Identifying  
296 Bacteriophage Sequences in Metagenomic Data Sets. *PLOS ONE*. 2016 Sep  
297 29;11(9):e0163111.
- 298 21. Abdelkareem AO, Khalil MI, Elaraby M, Abbas H, Elbehery AHA. VirNet: Deep attention  
299 model for viral reads identification. In: 2018 13th International Conference on Computer  
300 Engineering and Systems (ICCES). 2018. p. 623–6.
- 301 22. Hyatt D, Chen G-L, LoCascio PF, Land ML, Larimer FW, Hauser LJ. Prodigal:  
302 prokaryotic gene recognition and translation initiation site identification. *BMC*  
303 *Bioinformatics*. 2010 Mar 8;11(1):119.
- 304 23. Zheng T, Li J, Ni Y, Kang K, Misiakou M-A, Imamovic L, et al. Mining, analyzing, and  
305 integrating viral signals from metagenomic data. *Microbiome*. 2019 Mar 19;7(1):42.
- 306 24. Wheeler TJ, Eddy SR. nhmmer: DNA homology search with profile HMMs.  
307 *Bioinformatics*. 2013 Oct 1;29(19):2487–9.
- 308 25. Graziotin AL, Koonin EV, Kristensen DM. Prokaryotic Virus Orthologous Groups  
309 (pVOGs): a resource for comparative genomics and protein family annotation. *Nucleic*  
310 *Acids Res*. 2017 Jan 4;45(D1):D491–8.
- 311 26. chromoMap-An R package for Interactive Visualization and Annotation of Chromosomes  
312 [Internet]. [cited 2020 May 7]. Available from: [https://cran.r-](https://cran.r-project.org/web/packages/chromoMap/vignettes/chromoMap.html)  
313 [project.org/web/packages/chromoMap/vignettes/chromoMap.html](https://cran.r-project.org/web/packages/chromoMap/vignettes/chromoMap.html)
- 314 27. Boettiger C. An introduction to Docker for reproducible research. *ACM SIGOPS Oper*  
315 *Syst Rev*. 2015 Jan 20;49(1):71–79.
- 316 28. Kleiner M, Hooper LV, Duerkop BA. Evaluation of methods to purify virus-like particles  
317 for metagenomic sequencing of intestinal viromes. *BMC Genomics*. 2015 Jan 22;16:7.
- 318 29. Nurk S, Meleshko D, Korobeynikov A, Pevzner PA. metaSPAdes: a new versatile  
319 metagenomic assembler. *Genome Res*. 2017 May;27(5):824–34.
- 320
